# Supplementary material for: Fluorescence and energy transfer properties of heterometallic lanthanide-titanium oxo clusters coordinated with anthracenecarboxylate ligands
Source: Royal Society of Chemistry journal article supplement (doi:10.1039/c4dt02968b), 2014-11-19
Supplement: c4dt02968b1.pdf [file c4dt02968b1.pdf]

## Supporting Information

### **Fluorescent and energy transfer properties of heterometallic lanthanide-titanium oxo clusters coordinated with anthracenecarboxylate ligand**

Sheng Wang, Hu-Chao Su, Lan Yu, Xiao-Wei Zhao, Li-Wen Qian, Qin-Yu Zhu\* and Jie Dai\*

**Table S1.** Crystal Data and Structural Refinement Parameters for **1–3**.

**Figure S1.** FTIR spectra of **1–4**

**Figure S2.** XRD patterns of the bulk microcrystal samples of **1–4** along with those simulated from the data of single-crystal analysis.

**Figure S3.** Thermogravimetric analysis of **1–4**.

**Figure S4.** Molecular structures of **1** (a) and **2** (b) with the ellipsoid presentation.

**Figure S5.** Ball-stick structures of **3** (a) and **4** (b).

**Figure S6.** Solid state fluorescence spectra of **2** and **4**, also illustrating the result of energy transfer within the cluster.

**Figure S7.** Solid state fluorescence spectra of **1** and **2**.

**Table S1.** Crystal Data and Structural Refinement Parameters for **1–3**.

|                                                             | <b>1</b>                                                                                                         | <b>2</b>                                                                                                         | <b>3</b>                                                                                          |
|-------------------------------------------------------------|------------------------------------------------------------------------------------------------------------------|------------------------------------------------------------------------------------------------------------------|---------------------------------------------------------------------------------------------------|
| formula                                                     | C <sub>76</sub> H <sub>126</sub> Cl <sub>2</sub> Nd <sub>2</sub> N <sub>2</sub> O <sub>42</sub> Ti <sub>10</sub> | C <sub>76</sub> H <sub>126</sub> Cl <sub>2</sub> Eu <sub>2</sub> N <sub>2</sub> O <sub>42</sub> Ti <sub>10</sub> | C <sub>62</sub> H <sub>124</sub> Cl <sub>2</sub> Nd <sub>2</sub> O <sub>42</sub> Ti <sub>10</sub> |
| fw                                                          | 2578.17                                                                                                          | 2593.61                                                                                                          | 2379.83                                                                                           |
| cryst size (mm <sup>3</sup> )                               | 0.20 × 0.30 × 0.50                                                                                               | 0.20 × 0.30 × 0.50                                                                                               | 0.25 × 0.25 × 1.00                                                                                |
| cryst syst                                                  | triclinic                                                                                                        | triclinic                                                                                                        | monoclinic                                                                                        |
| space group                                                 | <i>P</i> $\bar{1}$                                                                                               | <i>P</i> $\bar{1}$                                                                                               | <i>P</i> 2 <sub>1</sub> / <i>n</i>                                                                |
| <i>a</i> (Å)                                                | 14.890(3)                                                                                                        | 14.6136(8)                                                                                                       | 15.092(3)                                                                                         |
| <i>b</i> (Å)                                                | 14.976(3)                                                                                                        | 14.7178(8)                                                                                                       | 17.568(4)                                                                                         |
| <i>c</i> (Å)                                                | 15.484(3)                                                                                                        | 15.0540(8)                                                                                                       | 18.631(4)                                                                                         |
| $\alpha$ (deg)                                              | 64.46(3)                                                                                                         | 64.8600(15)                                                                                                      | 90.00                                                                                             |
| $\beta$ (deg)                                               | 77.29(3)                                                                                                         | 78.1730(15)                                                                                                      | 91.72(3)                                                                                          |
| $\gamma$ (deg)                                              | 63.90(3)                                                                                                         | 64.3150(14)                                                                                                      | 90.00                                                                                             |
| <i>V</i> (Å <sup>3</sup> )                                  | 2795.8(10)                                                                                                       | 2640.6(2)                                                                                                        | 4937.5(17)                                                                                        |
| <i>Z</i>                                                    | 1                                                                                                                | 1                                                                                                                | 2                                                                                                 |
| $\rho_{\text{calcd}}$ (g cm <sup>-3</sup> )                 | 1.531                                                                                                            | 1.646                                                                                                            | 1.599                                                                                             |
| <i>F</i> (000)                                              | 1306                                                                                                             | 1324                                                                                                             | 2408                                                                                              |
| $\mu$ (mm <sup>-1</sup> )                                   | 1.707                                                                                                            | 2.012                                                                                                            | 1.924                                                                                             |
| <i>T</i> (K)                                                | 293(2)                                                                                                           | 296(2)                                                                                                           | 293(2)                                                                                            |
| reflns collected                                            | 25538                                                                                                            | 57727                                                                                                            | 26691                                                                                             |
| unique reflns                                               | 12333                                                                                                            | 12176                                                                                                            | 11132                                                                                             |
| observed reflns                                             | 6538                                                                                                             | 9583                                                                                                             | 8909                                                                                              |
| GOF on <i>F</i> <sup>2</sup>                                | 1.055                                                                                                            | 1.023                                                                                                            | 1.198                                                                                             |
| <i>R</i> <sub>1</sub> [ <i>I</i> > 2 $\sigma$ ( <i>I</i> )] | 0.0786                                                                                                           | 0.0401                                                                                                           | 0.0759                                                                                            |
| <i>wR</i> <sub>2</sub>                                      | 0.1466                                                                                                           | 0.1045                                                                                                           | 0.1381                                                                                            |

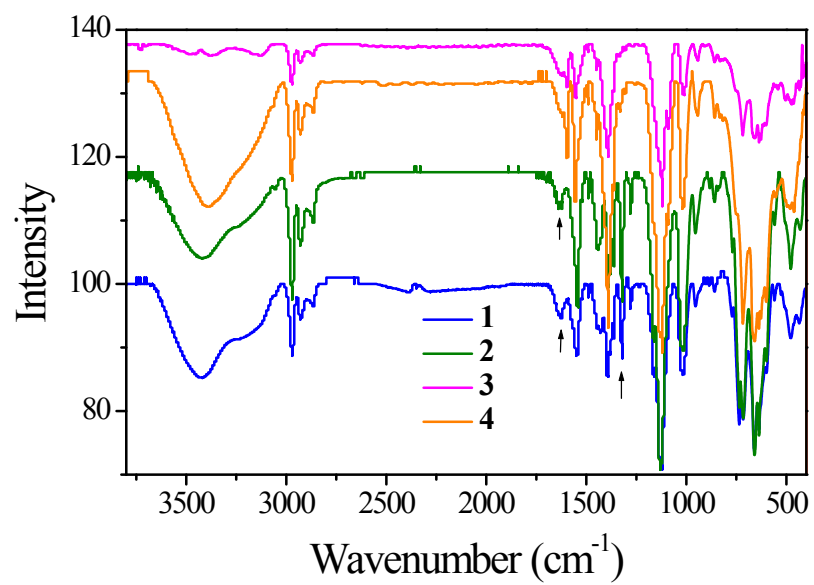

**Figure S1.** FTIR spectra of 1-4.

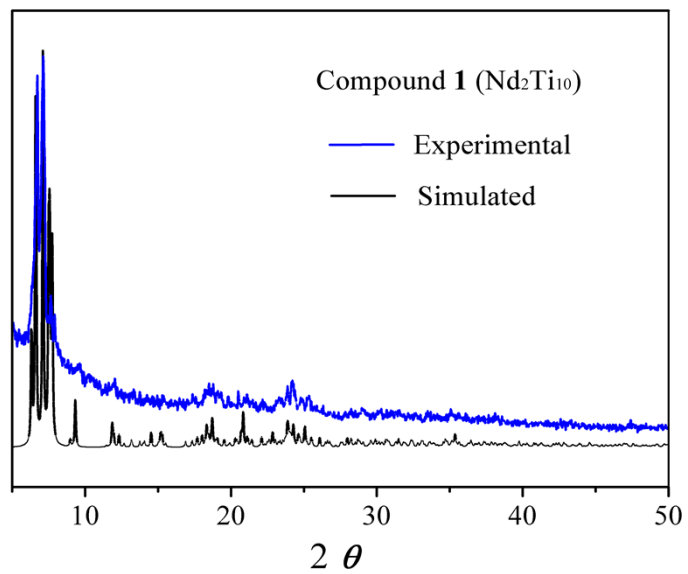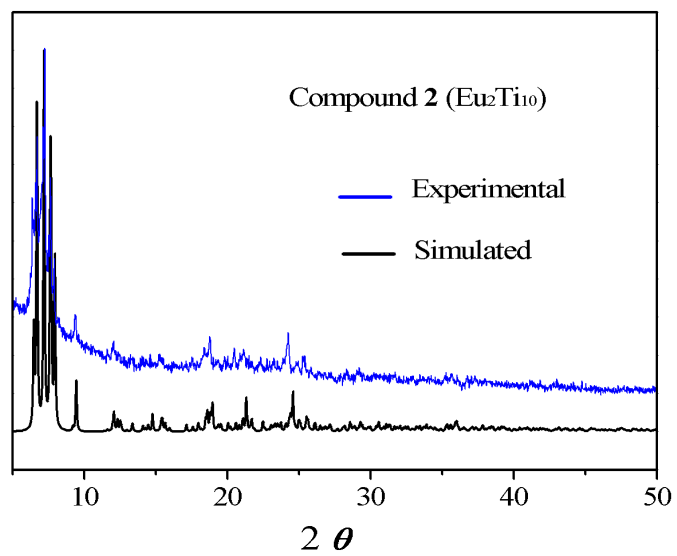

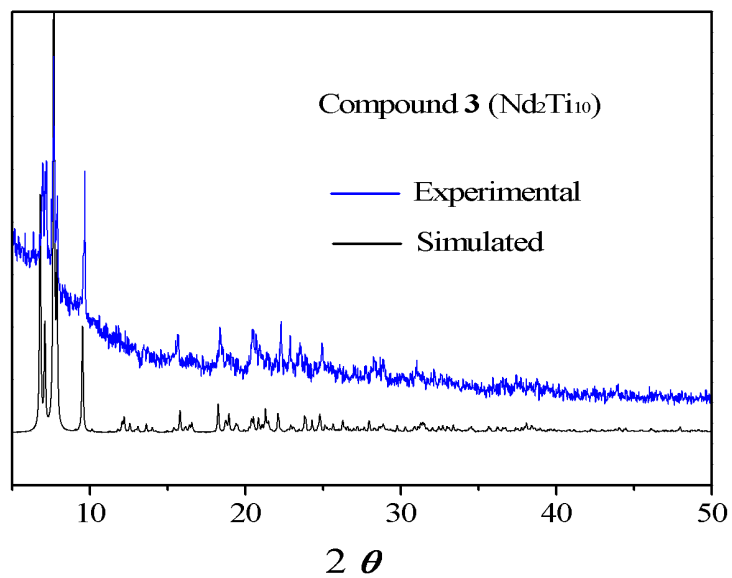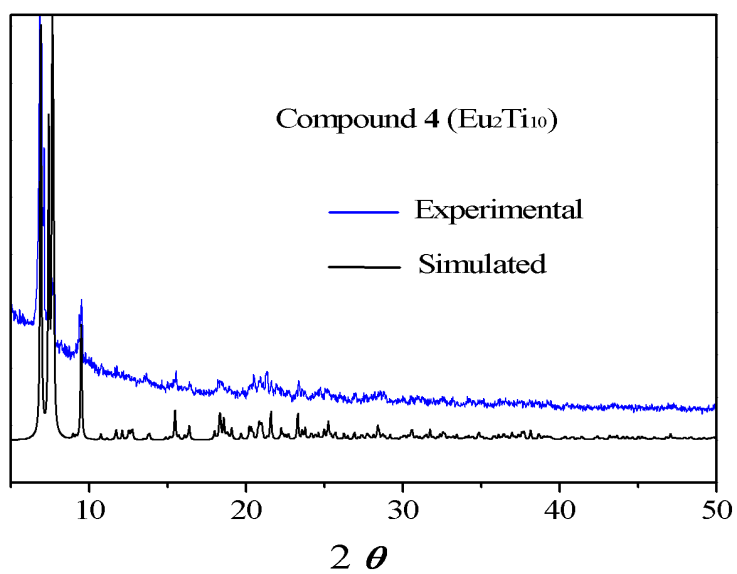

**Figure S2.** XRD patterns of the bulk microcrystal samples of **1–4** along with those simulated from the data of single-crystal analysis.

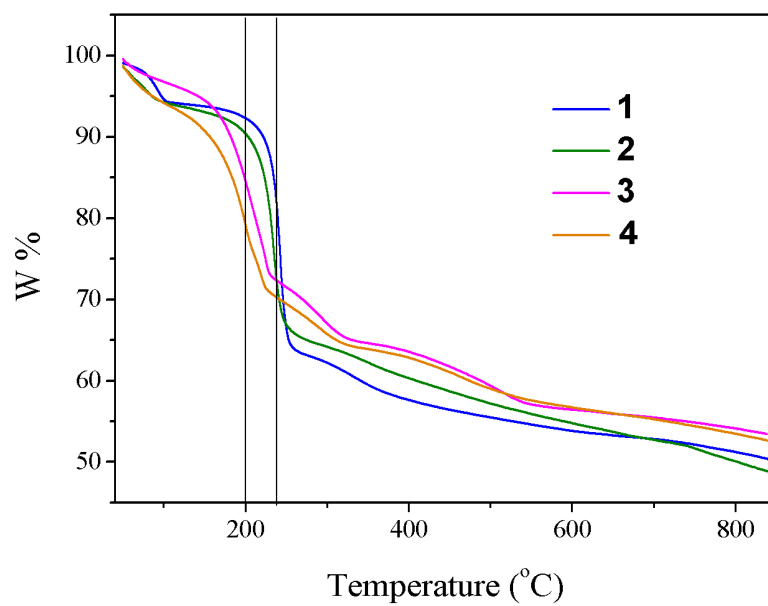

**Figure S3.** Thermogravimetric analysis of 1-4.

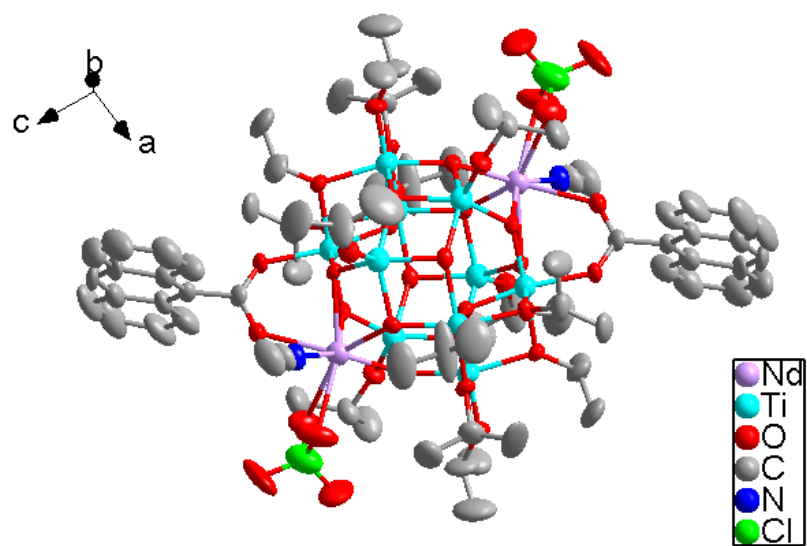

(a)

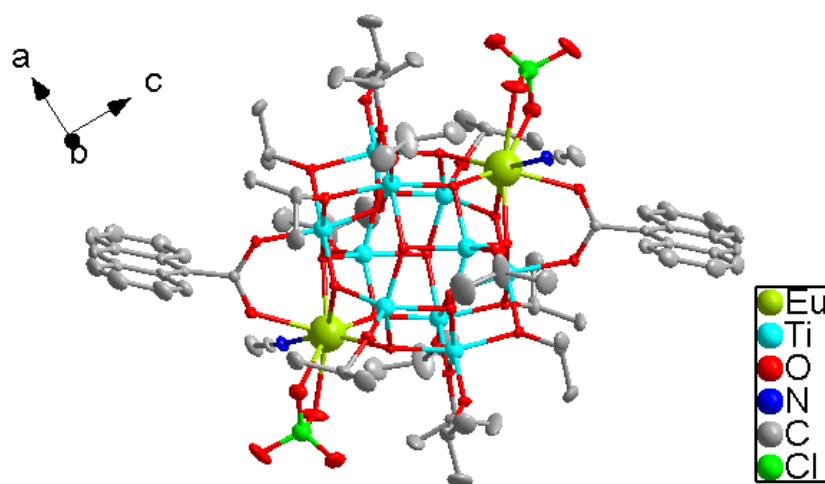

(b)

**Figure S4.** Molecular structures of 1 (a) and 2 (b) with the ellipsoid presentation.

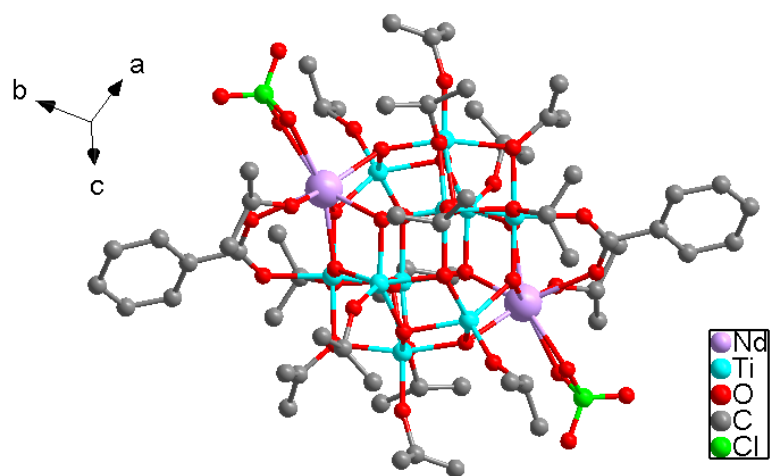

(a)

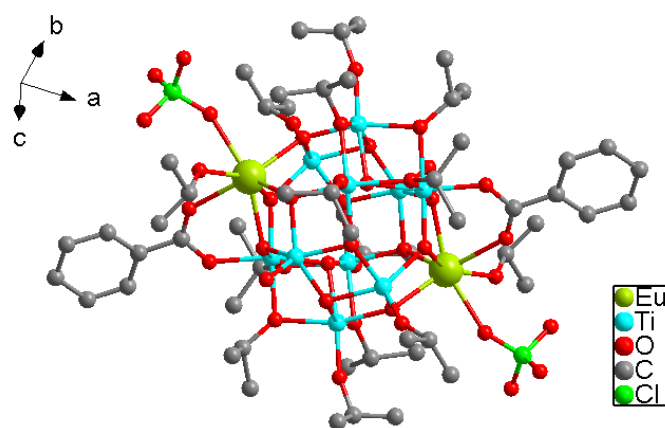

(b)

**Figure S5.** Ball-stick structures of **3** (a) and **4** (b).



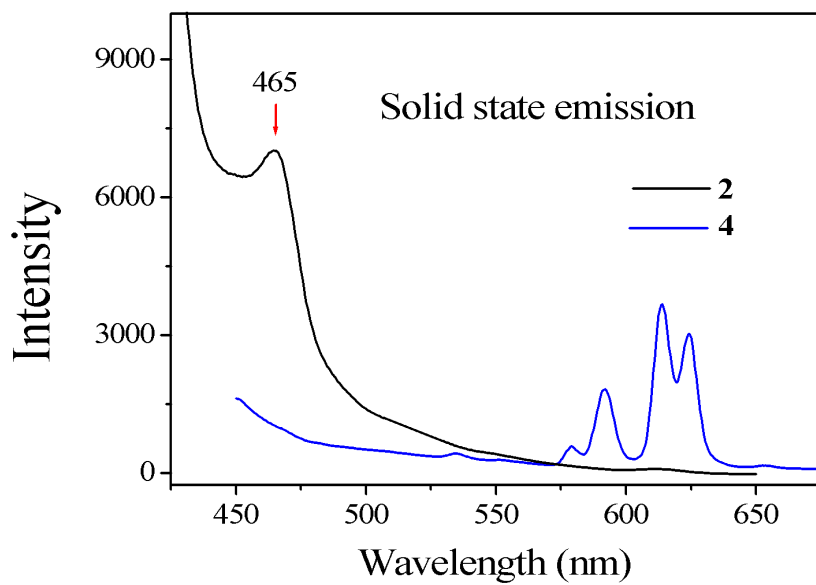

**Figure S6.** Solid state fluorescence spectra of **2** and **4**, also illustrating the result of energy transfer within the cluster.

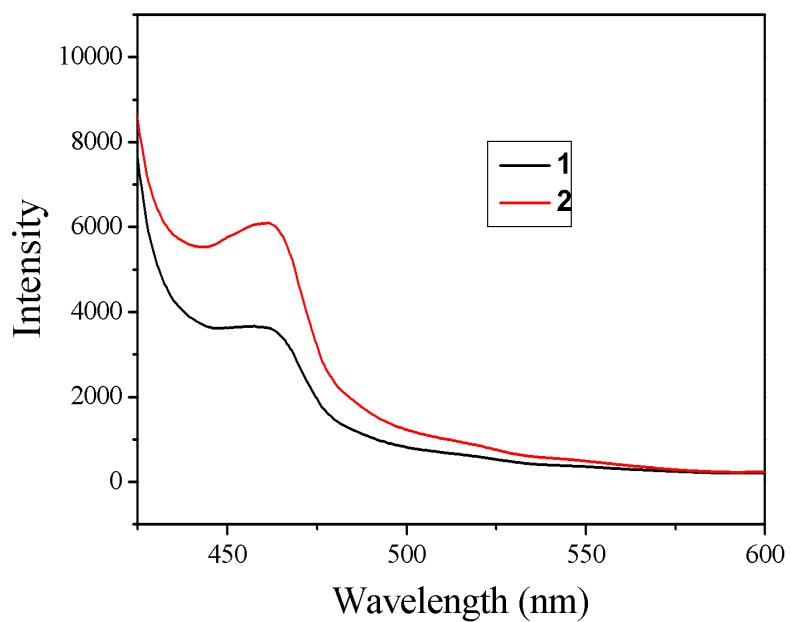

**Figure S7.** Solid state fluorescence spectra of **1** and **2**.
